# Supplementary material for: Iberian Margin surface ocean cooling led freshening during Marine Isotope Stage 6 abrupt cooling events
Source: PubMed Central journal article supplement (PMC10477208; doi:10.1038/s41467-023-41142-8), 2023-09-04
Supplement: 41467_2023_41142_MOESM1_ESM.pdf [file 41467_2023_41142_MOESM1_ESM.pdf]

## Supplementary for “Iberian Margin surface ocean cooling led freshening during Marine Isotope Stage 6 abrupt cooling events”

Hongrui Zhang<sup>1\*</sup>, Yongsong Huang<sup>2</sup>, Reto Wijker<sup>1</sup>, Isabel Cacho<sup>3</sup>, Judit Torner<sup>3</sup>, Madeleine Santos<sup>1</sup>, Oliver Kost<sup>1</sup>, Bingbing Wei<sup>4</sup>, Heather Stoll<sup>1</sup>

1. Geological Institute, ETH Zürich, 8092 Zürich, Switzerland;
2. Department of Earth, Environmental and Planetary Sciences, Brown University, Providence, RI 02912, USA;
3. Grup de Recerca Consolidat en Geociències Marines, Department de Dinàmica de la Terra i de l'Oceà, Universitat de Barcelona, Barcelona, Spain;
4. Alfred Wegener Institute, Helmholtz Center for Polar and Marine Research, Bremerhaven, 27570, Germany

\* Correspondence and requests for materials should be addressed to HZ

Email: [zhz@ethz.ch](mailto:zhz@ethz.ch)

### **This document includes:**

Figure S1. Gas chromatographic results in two samples with low and high  $C_{37:4}\%$ .

Figure S2. Sea surface temperature during MIS 6 in different site on the Iberian Margin

Figure S3. Reworked fossils and oxygen isotope of deep ocean.

Figure S4. The oxygen isotope and Mg/Ca ratio measurements.

Figure S5. Comparison of alkenone-based SST and Mg/Ca SST on the Iberian Margin

Figure S6. Cross plot among  $C_{37:4}\%$ ,  $\delta^{18}O_{sw}$  and alkenone-based SST.

Table S1. The endmember of mixing calculations in Figure 2.

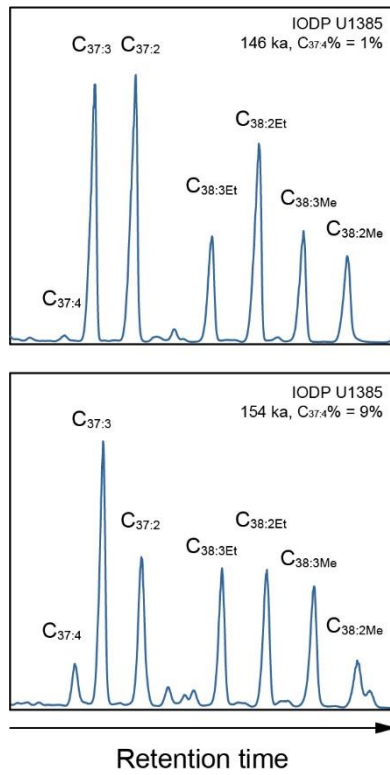

Figure S1. Gas chromatographic results in two samples with low and high C<sub>37:4%</sub>.

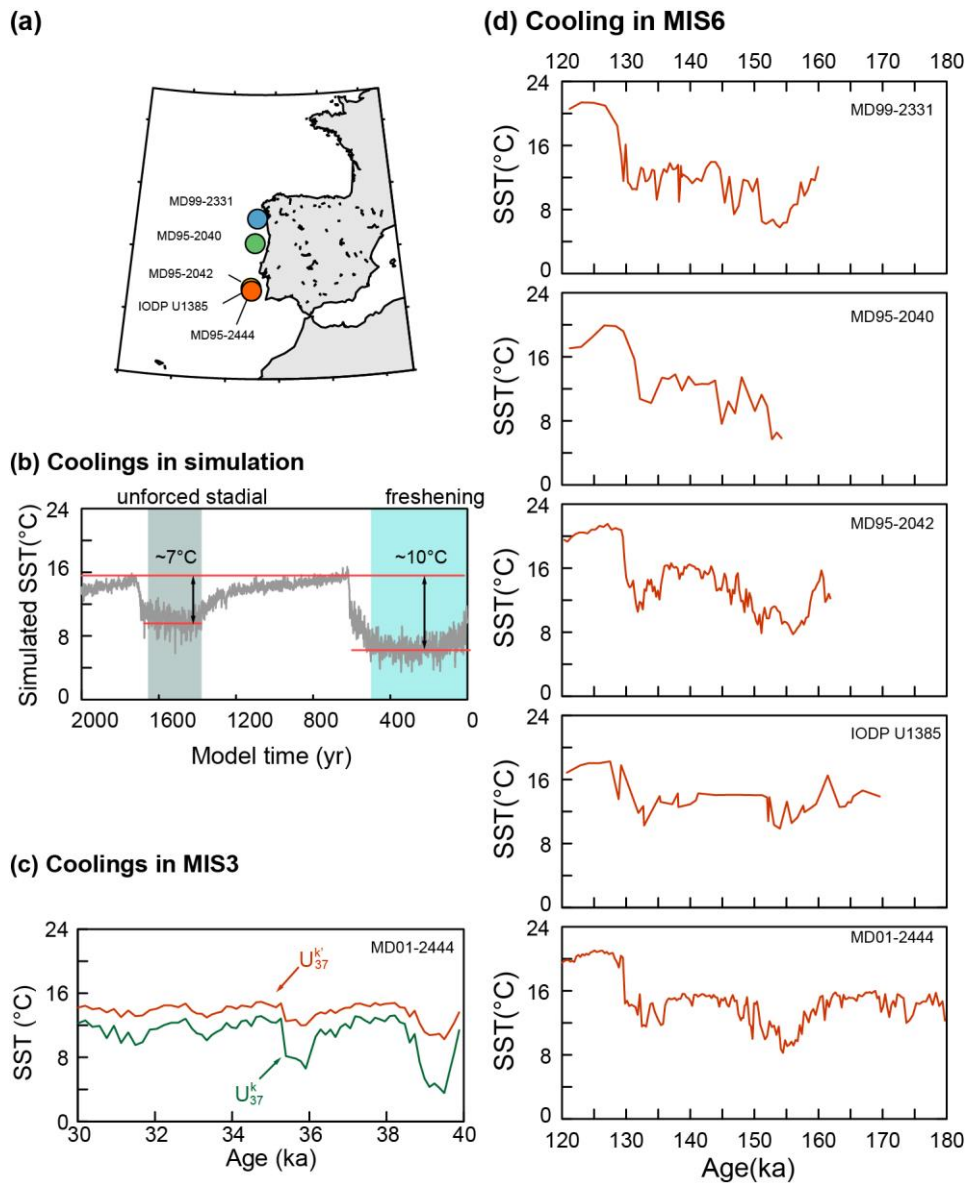

**Figure S2. SST by  $U_{37}^k$  along the Iberian Margin.** (a) Position of each site. (b) Simulated cooling events on the Iberian Margin (37.97°N, 10.2°W) with forced freshwater (light blue) and without freshwater (grey)<sup>1</sup>. (c) SST reconstructed by alkenone thermometers in the MIS 3. (d) The data in site MD99-2331, MD95-2040 and MD95-2042 are from <sup>2</sup>. The results in site IODP U1385 are from this study and <sup>3</sup>. Red lines are SST reconstructed by  $U_{37}^k$  with Bayesian calibration. Green lines are SST reconstructed by  $U_{37}^k$ <sup>4</sup>.

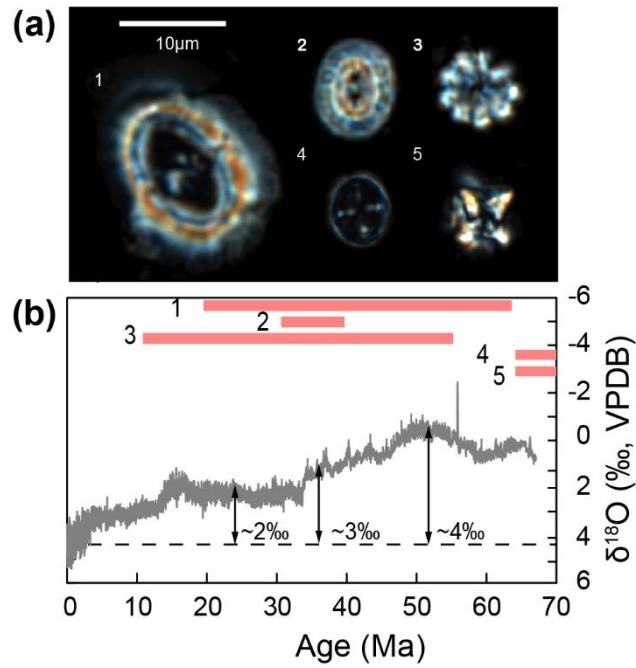

**Figure S3. Reworked fossils and oxygen isotope of deep ocean. (a)** fossils in circular polarized microscope. From 1 to 5: *Chiasmolithus* spp., *Reticulofenestra filewiczii*, *Discaster deflandrei*, *Chiastozygus stylesii* and *Micula staurophora*. **(b)** The stack of deep ocean (benthic foraminifera) oxygen isotope<sup>5</sup>. The pink bars represent the occurrence time of fossils (Nannotax3).

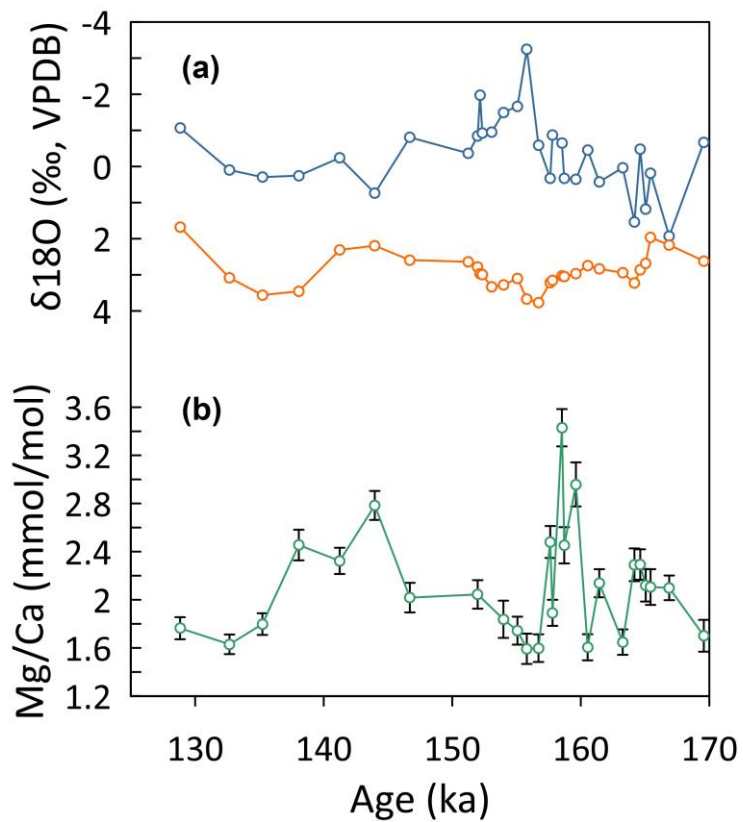

**Figure S4. The oxygen isotope and Mg/Ca ratio measurements. (a)** Oxygen isotope of planktonic foraminifera, *Globigerina bulloides* (orange dots) and fine fraction (<63μm, blue dots). **(b)** The Mg/Ca ratio of *G. bulloides*. The error bars represent the standard deviation of measurement.

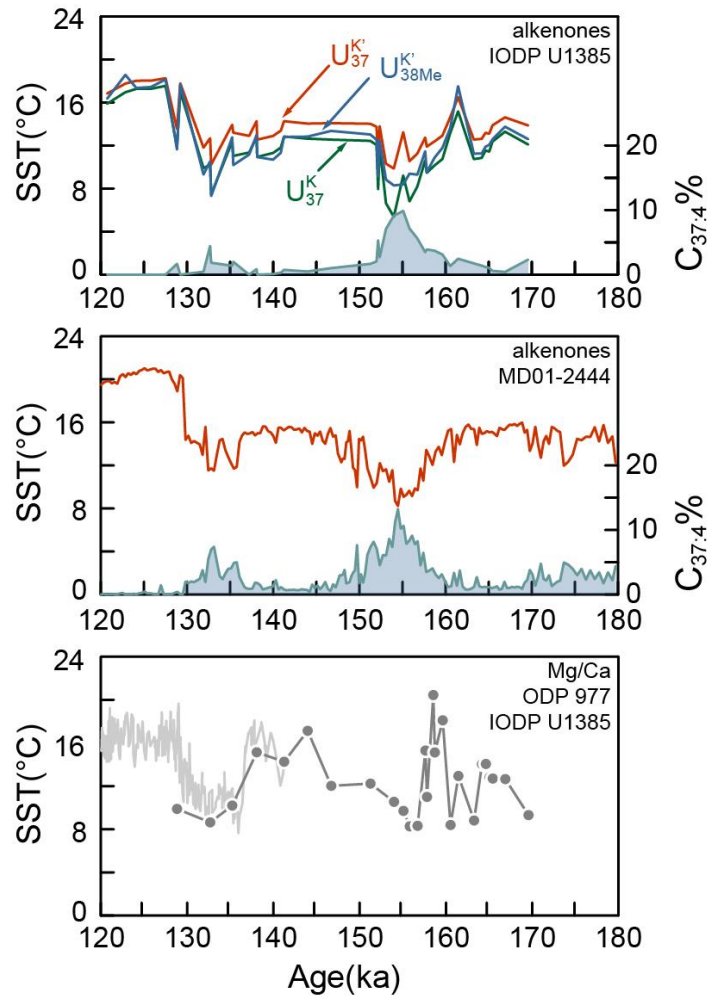

**Figure S5. Comparison of alkenone-based SST and Mg/Ca SST on the Iberian Margin.** Red lines are SST reconstructed by  $U_{37}^{K'}$  with Bayesian calibration <sup>6</sup>. Green lines are SST reconstructed by  $U_{37}^K$  by Rosell-Melé <sup>4</sup>. Blue lines are SST reconstructed by  $U_{38Me}^{K'}$  by Novak, et al. <sup>7</sup>. The shaded areas are  $C_{37:4}\%$ . Grey lines are Mg/Ca of *G. bulloides* in site ODP 977 <sup>8</sup> and grey dots are new records in this study.

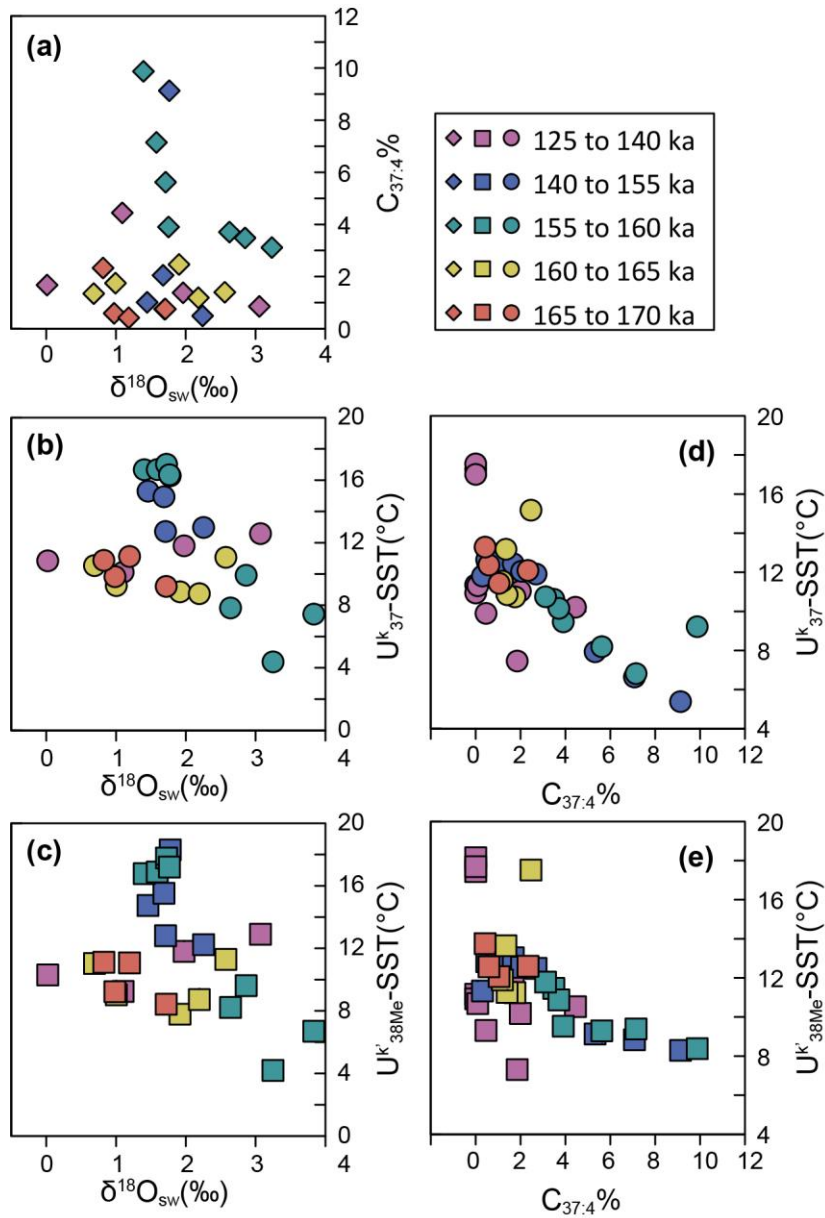

**Figure S6. Cross plot among  $C_{37:4}\%$ ,  $\delta^{18}O_{sw}$  and alkenone-based SST. (a)** Cross plot between  $C_{37:4}\%$  and  $\delta^{18}O_{sw}$ . **(b-e)** Cross plot among  $C_{37:4}\%$ ,  $\delta^{18}O_{sw}$  and SST estimated by  $U_{37}^K$  and  $U_{38Me}^K$ . The squares and dots in b-e represent SST reconstructed by  $U_{38Me}^K$  and  $U_{37}^K$ , respectively.

**Table S1. The endmember of mixing calculations in Figure 2.**

|                  | Group I             |                                      | Group II            |                                      | Group III warm      |                                      | Group III cold      |                                      |
|------------------|---------------------|--------------------------------------|---------------------|--------------------------------------|---------------------|--------------------------------------|---------------------|--------------------------------------|
|                  | C <sub>37:4</sub> % | C <sub>38ME</sub> :C <sub>38ET</sub> | C <sub>37:4</sub> % | C <sub>38ME</sub> :C <sub>38ET</sub> | C <sub>37:4</sub> % | C <sub>38ME</sub> :C <sub>38ET</sub> | C <sub>37:4</sub> % | C <sub>38ME</sub> :C <sub>38ET</sub> |
| <b>Figure 2c</b> | 40                  | 0.2                                  | --                  | --                                   | 0                   | 0.3-2                                | --                  | --                                   |
| <b>Figure 2d</b> | --                  | --                                   | 15-40               | 0                                    | 0                   | 0.3-1                                | --                  | --                                   |
| <b>Figure 2e</b> | --                  | --                                   | --                  | --                                   | 0                   | 0.3-1                                | 10-40               | 2                                    |

### Supplementary references

- 1 Pedro, J. B. *et al.* Dansgaard-Oeschger and Heinrich event temperature anomalies in the North Atlantic set by sea ice, frontal position and thermocline structure. *Quaternary Science Reviews* **289**, doi:10.1016/j.quascirev.2022.107599 (2022).
- 2 Davtian, N., Bard, E., Darfeuille, S., Ménot, G. & Rostek, F. The Novel Hydroxylated Tetraether Index RI-OH' as a Sea Surface Temperature Proxy for the 160-45 ka BP Period Off the Iberian Margin. *Paleoceanography and Paleoclimatology* **36**, doi:10.1029/2020pa004077 (2021).
- 3 Martrat, B. *et al.* Four climate cycles of recurring deep and surface water destabilizations on the Iberian margin. *Science* **317**, 502-507 (2007).
- 4 Rosell-Melé, A. Interhemispheric appraisal of the value of alkenone indices as temperature and salinity proxies in high-latitude locations. *Paleoceanography* **13**, 694-703, doi:10.1029/98PA02355 (1998).
- 5 Westerhold, T. *et al.* An astronomically dated record of Earth's climate and its predictability over the last 66 million years. *Science* **369**, 1383-1387, doi:10.1126/science.aba6853 (2020).
- 6 Tierney, J. E. & Tingley, M. P. BAYSPLINE: A New Calibration for the Alkenone Paleothermometer. *Paleoceanography and Paleoclimatology* **33**, 281-301, doi:10.1002/2017pa003201 (2018).
- 7 Novak, J. *et al.* UK'38ME Expands the linear dynamic range of the alkenone sea surface temperature proxy. *Geochimica et Cosmochimica Acta* **328**, 207-220, doi:10.1016/j.gca.2022.04.021 (2022).
- 8 Torner, J. *et al.* Ocean-atmosphere interconnections from the last interglacial to the early glacial: An integration of marine and cave records in the Iberian region. *Quaternary Science Reviews* **226**, 106037, doi:10.1016/j.quascirev.2019.106037 (2019).
